# Supplementary material
Source: PubMed Central journal article supplement (PMC4537424)

**a.**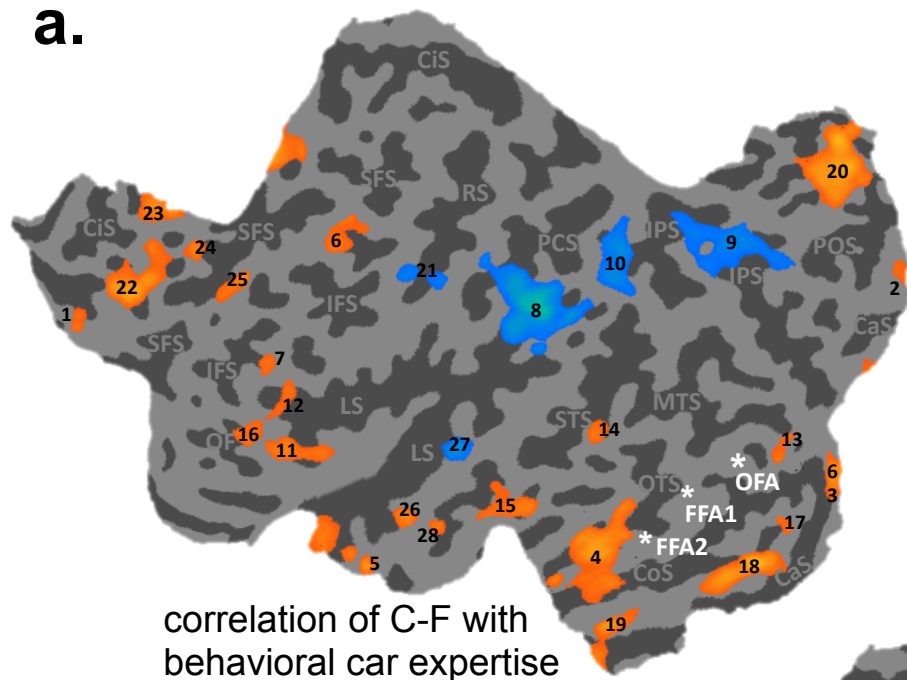**b.**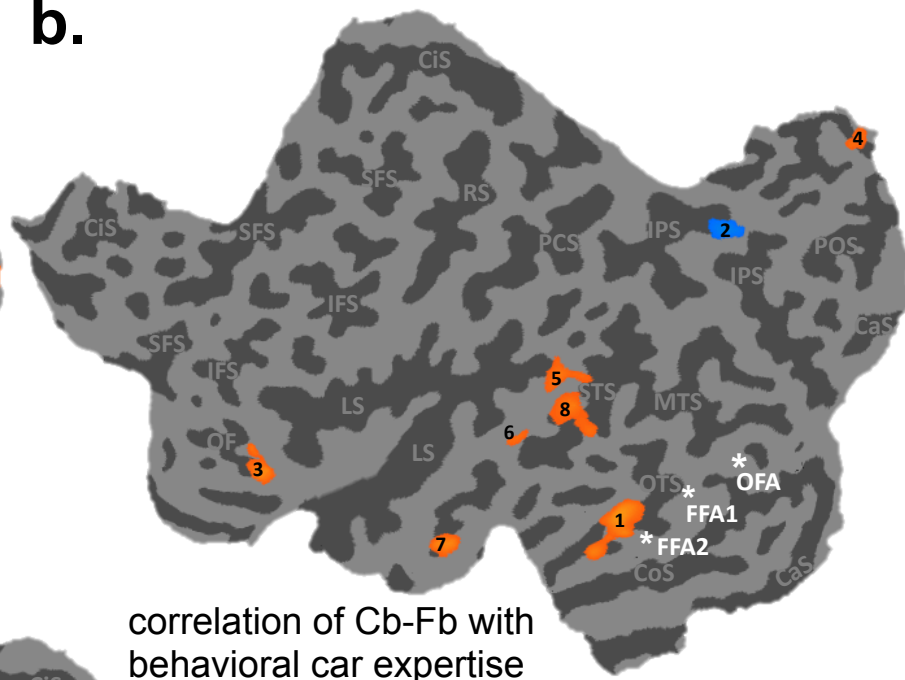**c.**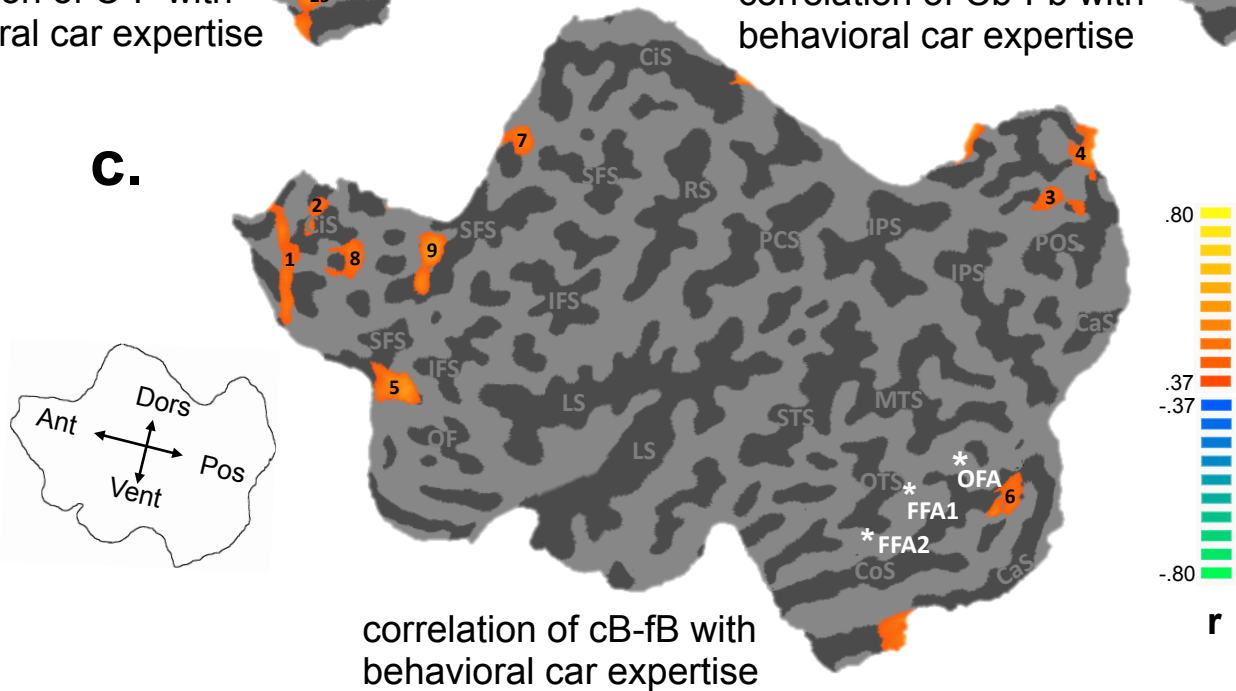

Supplement: supp_bhu060_bhu060supp_fig1.pdf [file supp_bhu060_bhu060supp_fig1.pdf]

**a.**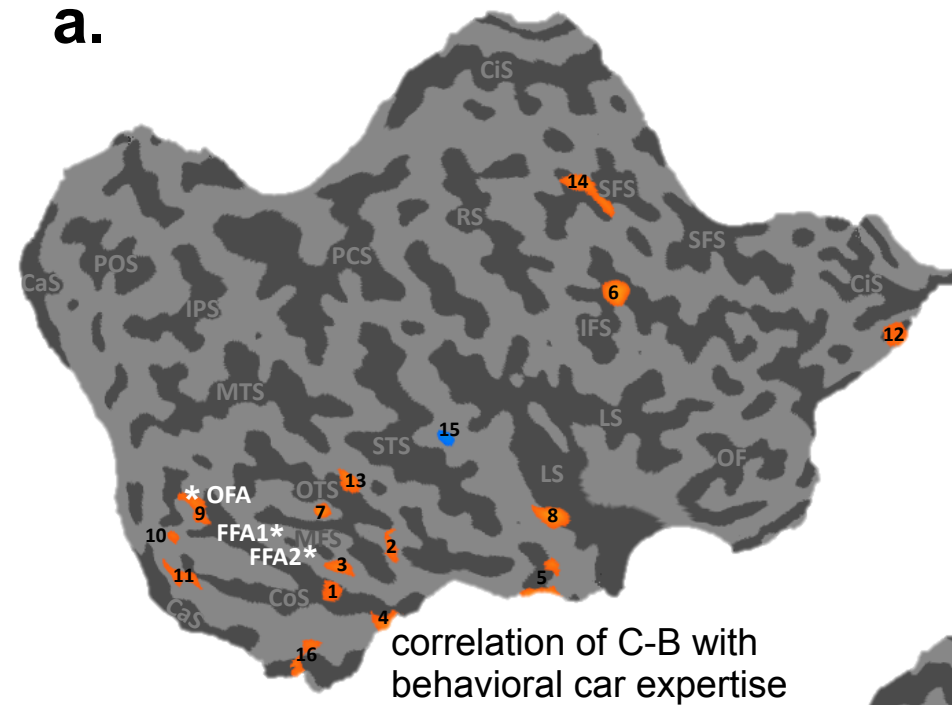**b.**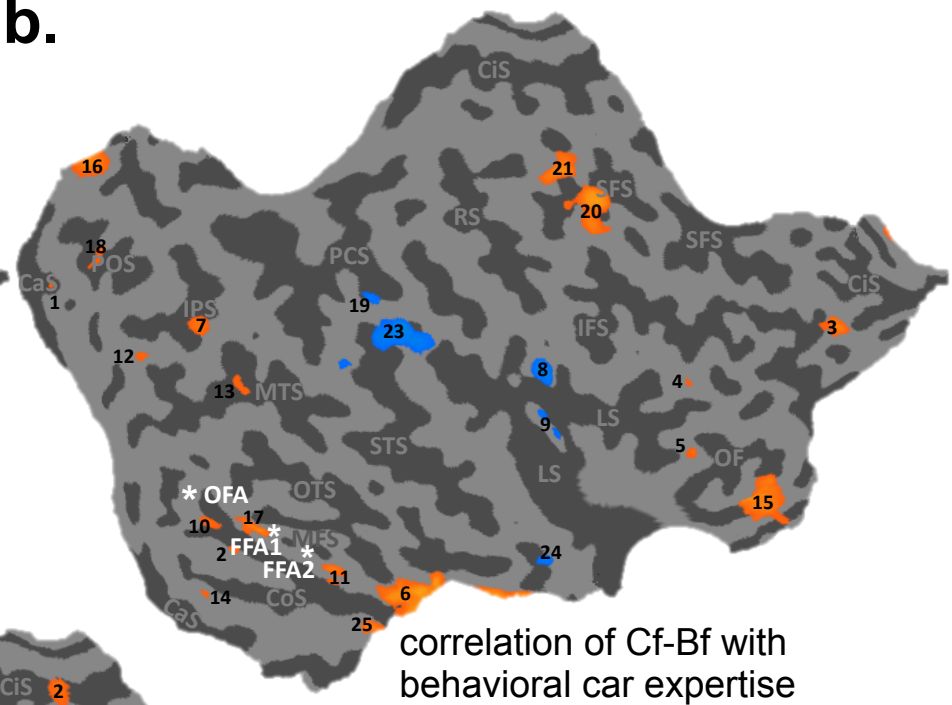**c.**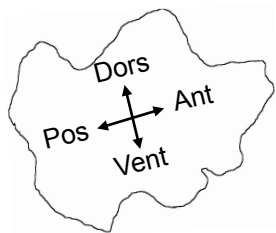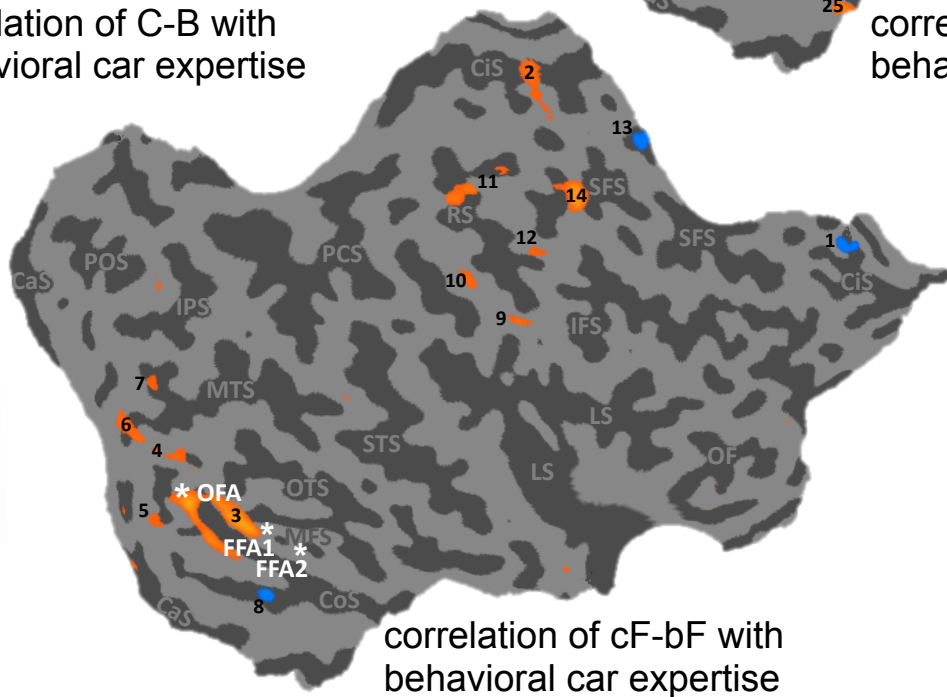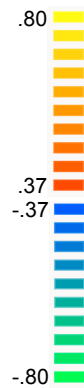**r**

Supplement: supp_bhu060_bhu060supp_fig2.pdf [file supp_bhu060_bhu060supp_fig2.pdf]

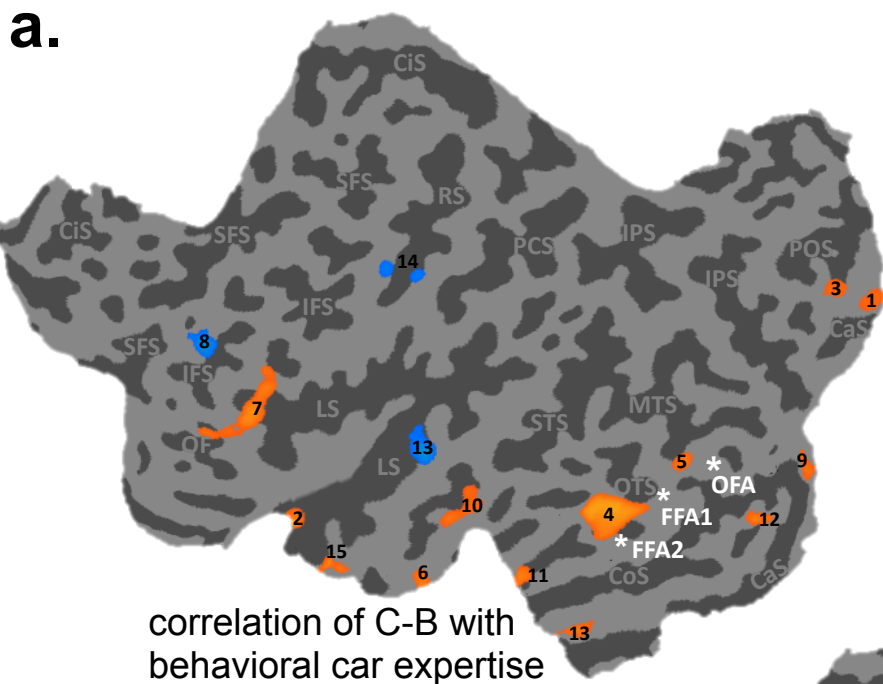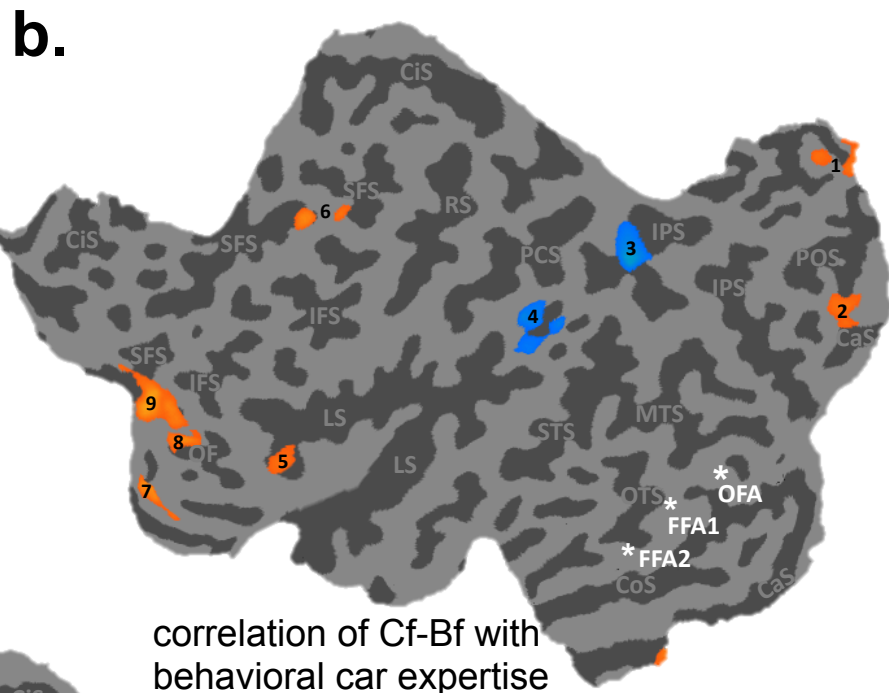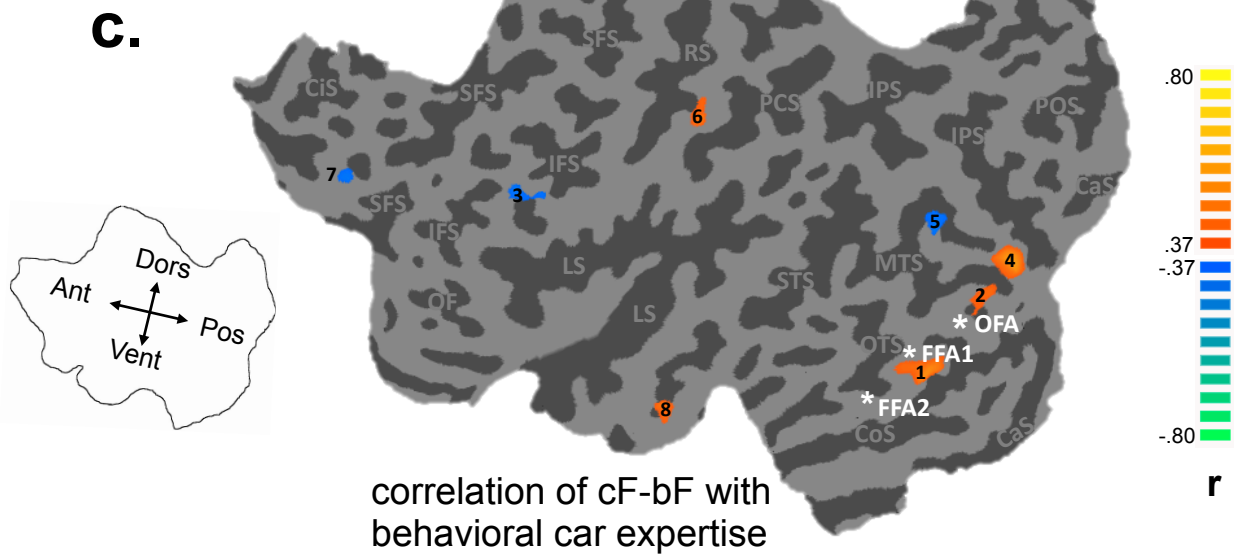

Supplement: supp_bhu060_bhu060supp_fig3.pdf [file supp_bhu060_bhu060supp_fig3.pdf]
